# Supplementary material for: Self-molten-polymerization synthesis of highly defected Mn/Sm binary oxides with mesoporous structures for efficient removal of toluene and chlorobenzene
Source: Royal Society of Chemistry journal article supplement (doi:10.1039/c9qi00039a), 2019-01-01
Supplement: c9qi00039a1.pdf [file c9qi00039a1.pdf]

## S2 Calculation of dispersion

Based on the TPR analysis of the samples, it can be found that at 380 °C, the conversion of  $\text{Mn}^{4+} \rightleftharpoons \text{Mn}^{3+}$  ( $\text{Mn}_2\text{O}_3 + \frac{1}{2}\text{O}_2 \rightarrow 2\text{MnO}_2$ ) occurred in the catalyst during the oxidation. Therefore, the formula for calculating dispersion is as follows:

$$D = \frac{n_{\text{Mn}}^* \times M_{\text{Mn}}}{W_{\text{Mn}}} = \frac{n_{\text{O}_2} \times M_{\text{Mn}}}{4W_{\text{Mn}}}$$

Where  $D$ ,  $n_{\text{Mn}}^*$ ,  $M_{\text{Mn}}$ ,  $W_{\text{Mn}}$ , and  $n_{\text{O}_2}$  are the dispersion of Mn on the surface of catalysts, effective Mn content of unit mass catalyst ( $\text{mol} \cdot \text{g}^{-1}$ ), relative atomic mass of Mn and percentage of Mn element in catalysts, oxygen-consumption per unit mass of catalyst ( $\text{mol} \cdot \text{g}^{-1}$ ), respectively.
